# Supplementary material for: Sertoli Cells Express Accommodation, Survival, and Immunoregulatory Factors When Exposed to Normal Human Serum
Source: MDPI journal article supplement (doi:10.3390/biomedicines11061650), 2023-06-06
Supplement: s1 [file s1]

A

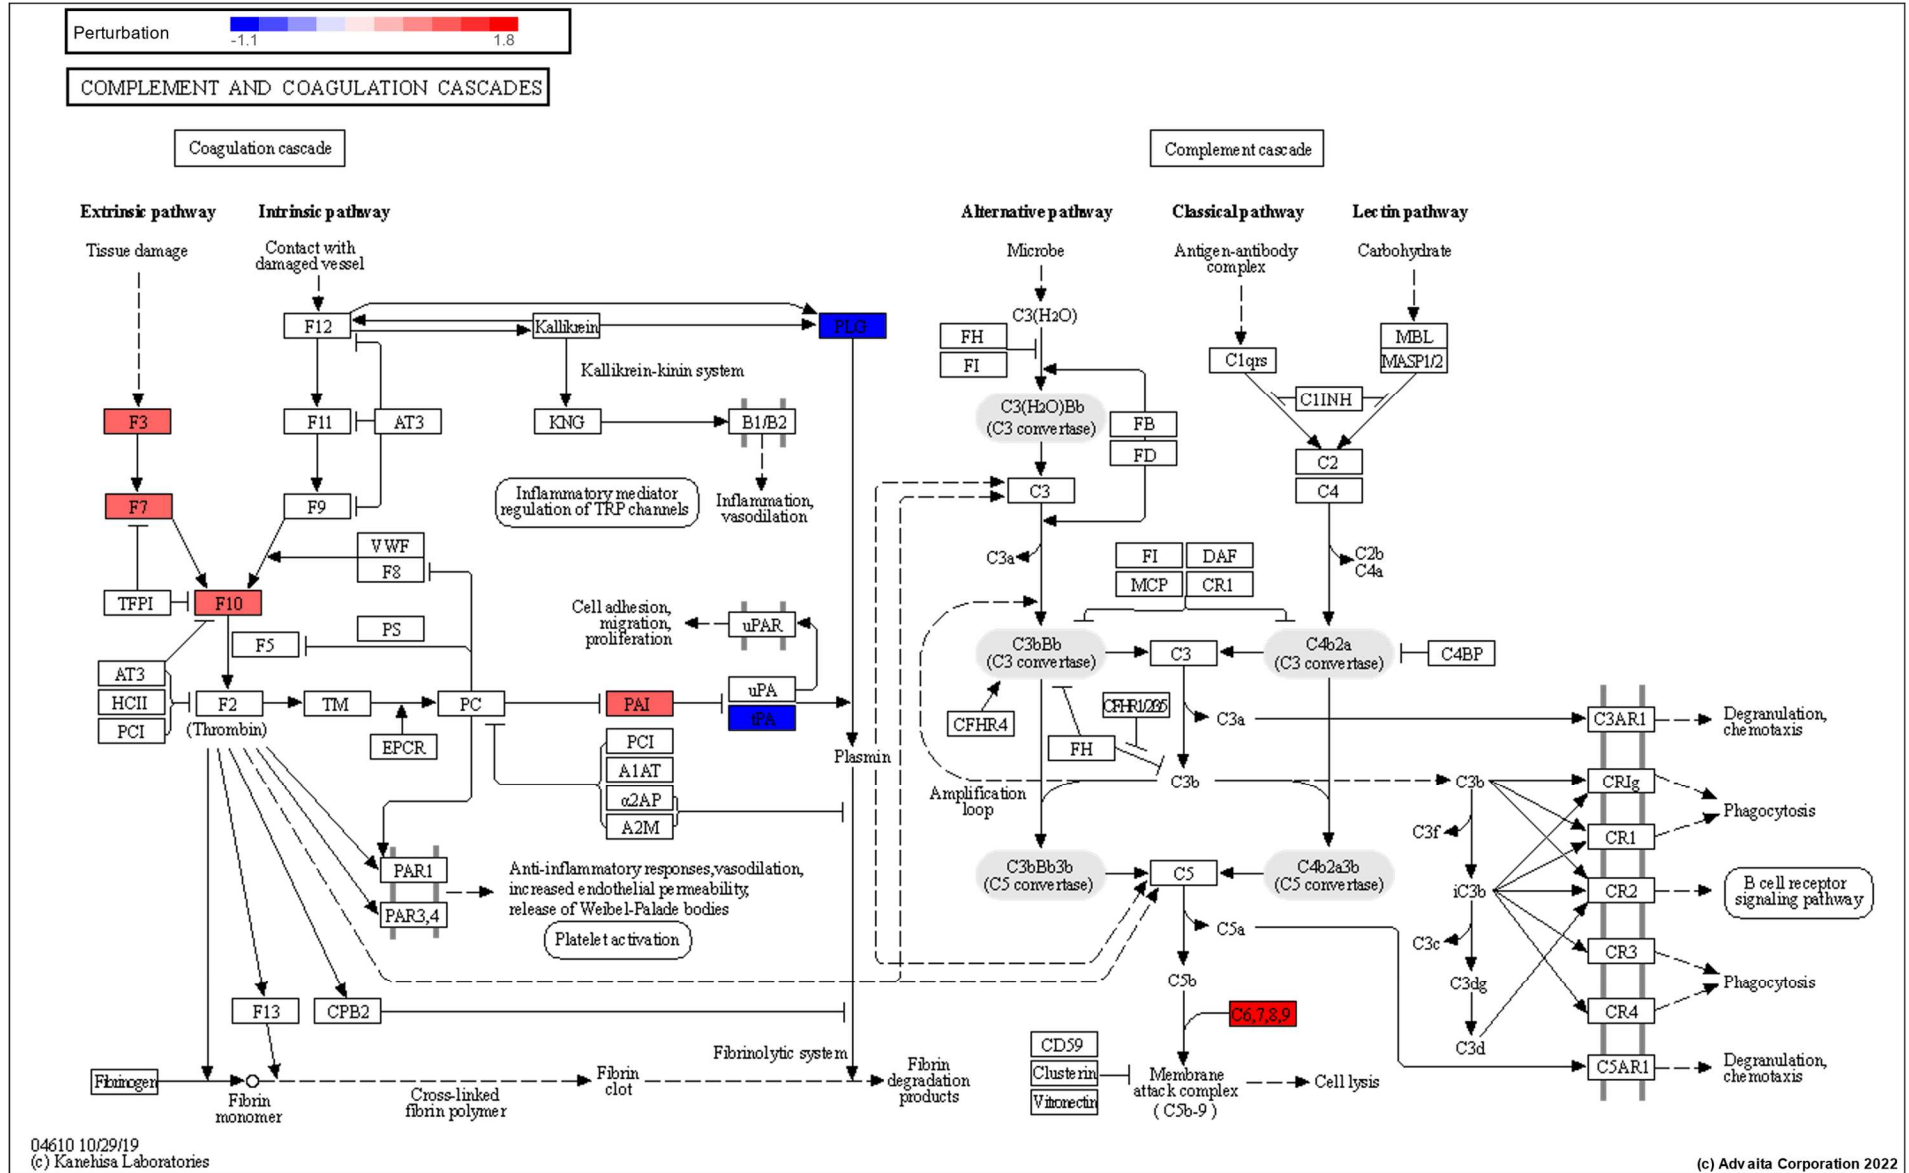

**B**

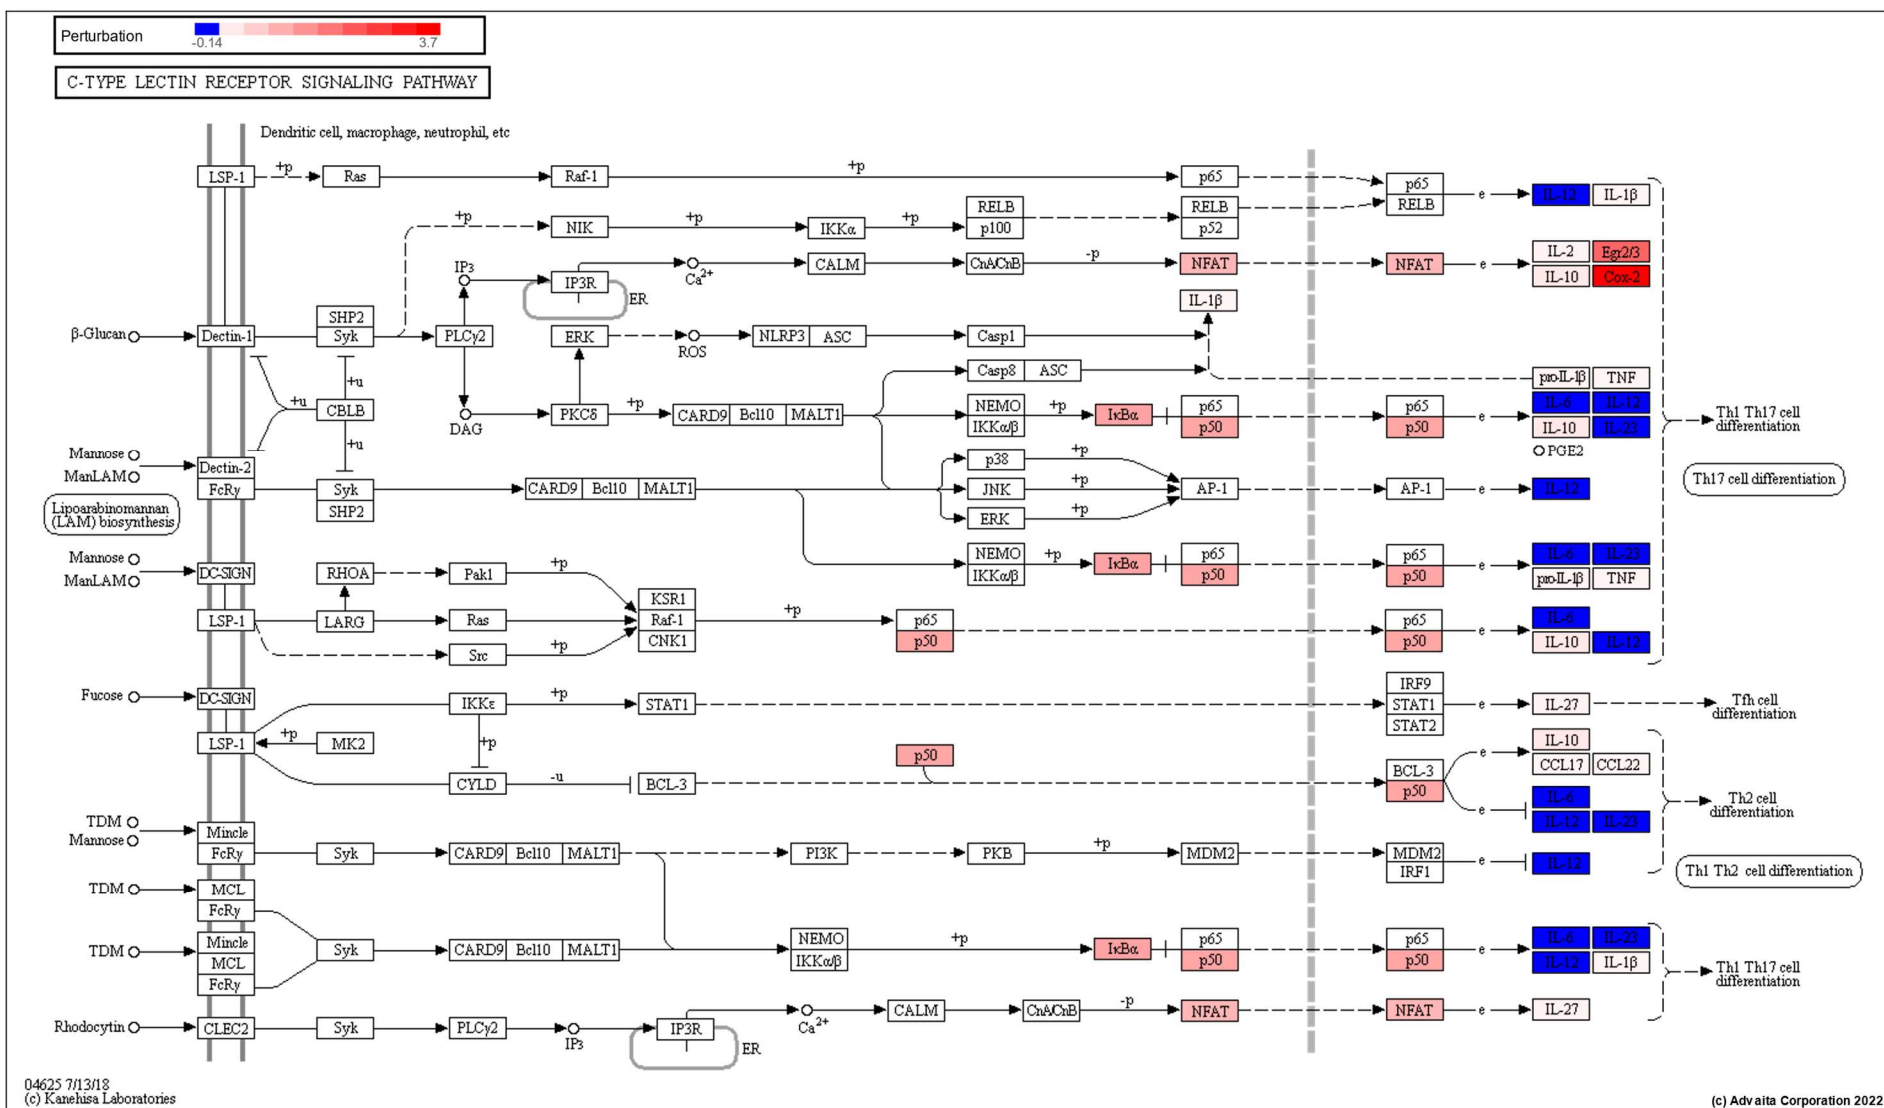

C

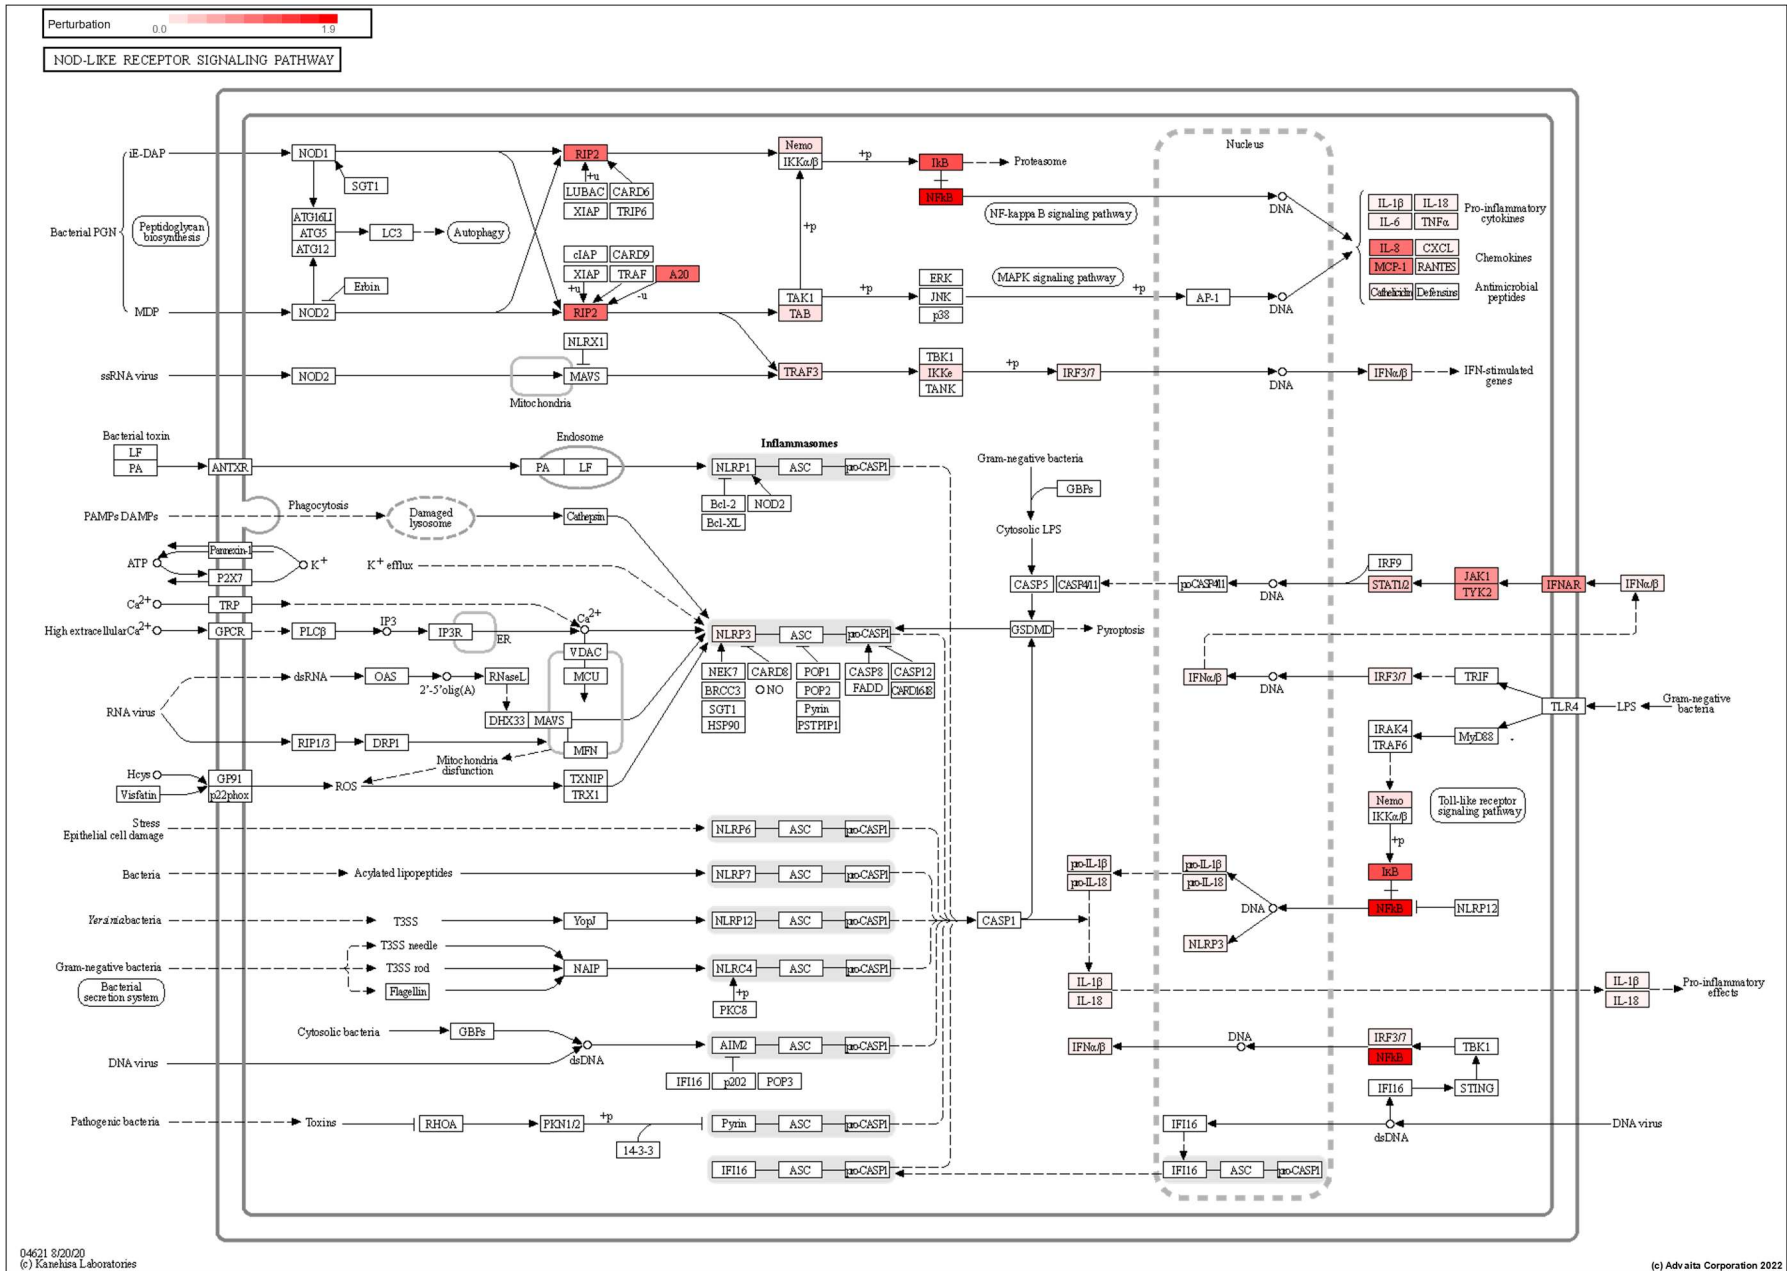

D

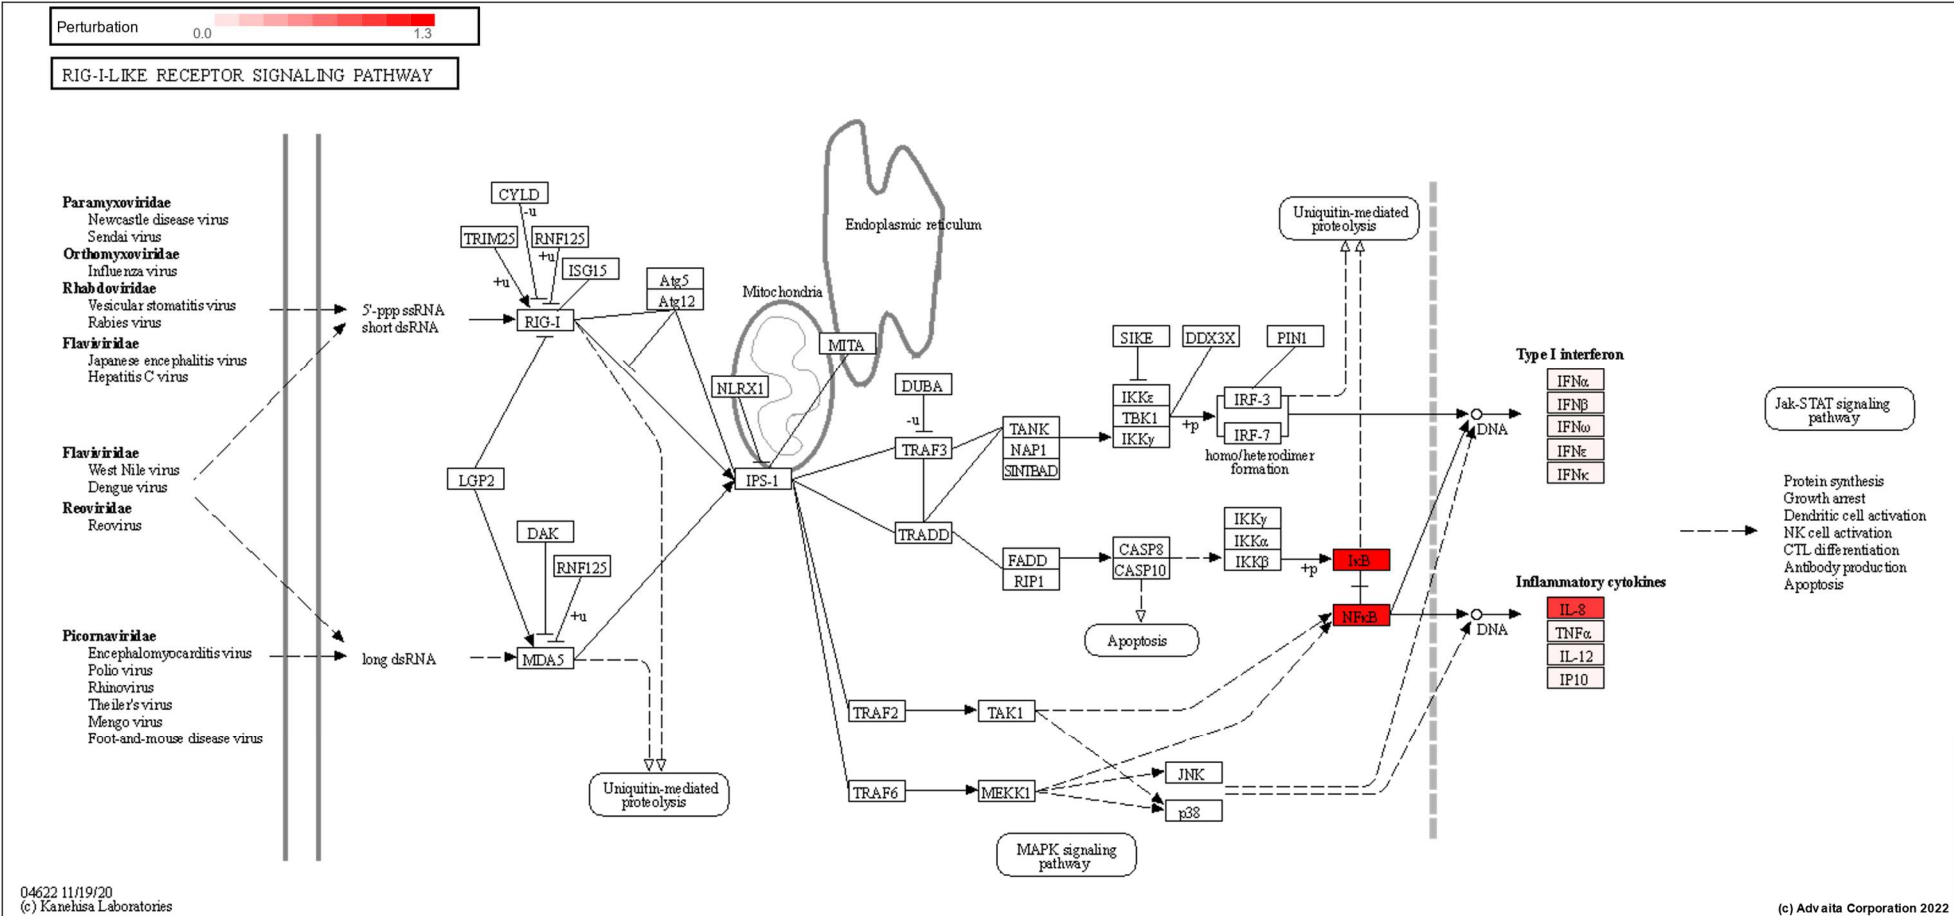

E

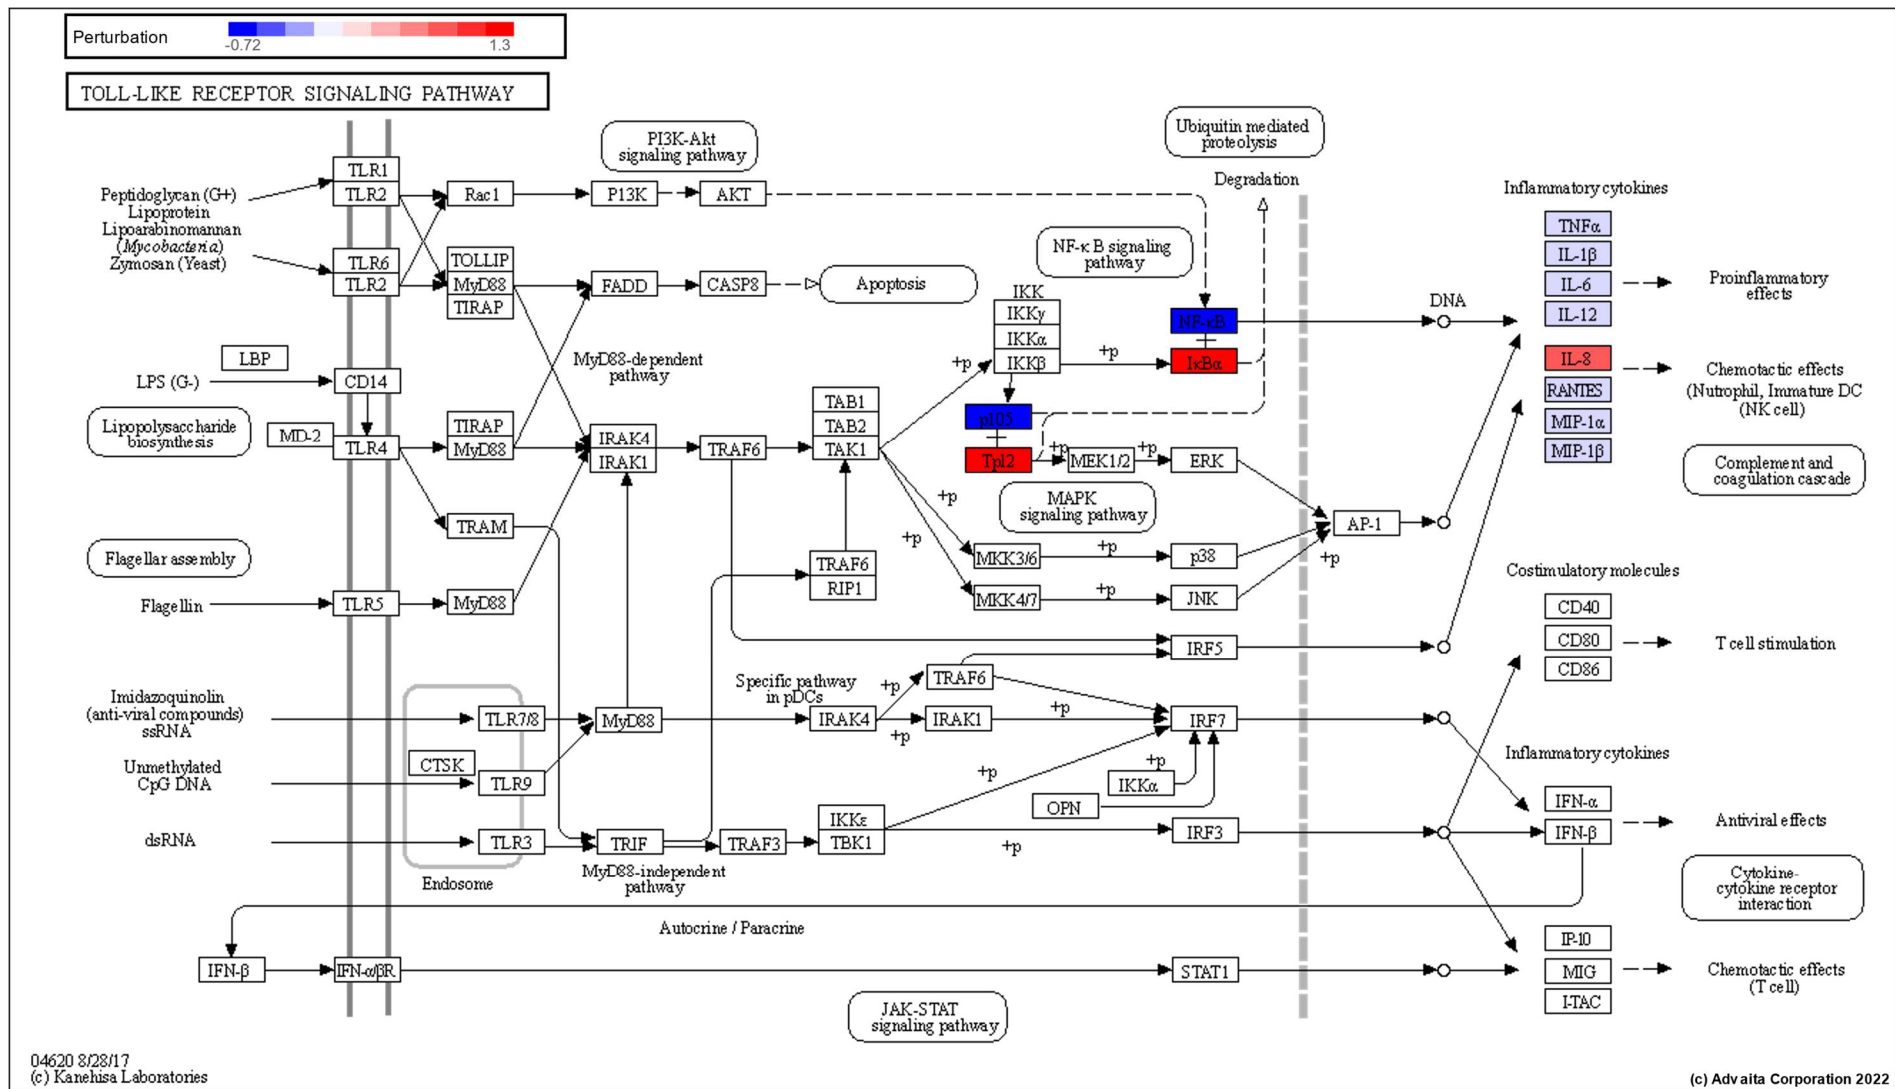

**Figure S3.** Innate immune signaling pathways. Innate immune pathways in NPSC affected by NHS include (A) the complement and coagulation cascade, (B) CLR signaling, (C) NLR signaling, (D) RLR signaling, and (E) TLR signaling pathways. Pathway perturbations are represented. Red highlighted genes are projected to be significantly upregulated while blue highlighted genes are projected to be significantly downregulated. Pathway analysis figures were created with Advaita iPathwayGuide.
