# Supplementary material for: Sertoli Cells Express Accommodation, Survival, and Immunoregulatory Factors When Exposed to Normal Human Serum
Source: MDPI journal article supplement (doi:10.3390/biomedicines11061650), 2023-06-06
Supplement: s1 [file s1]

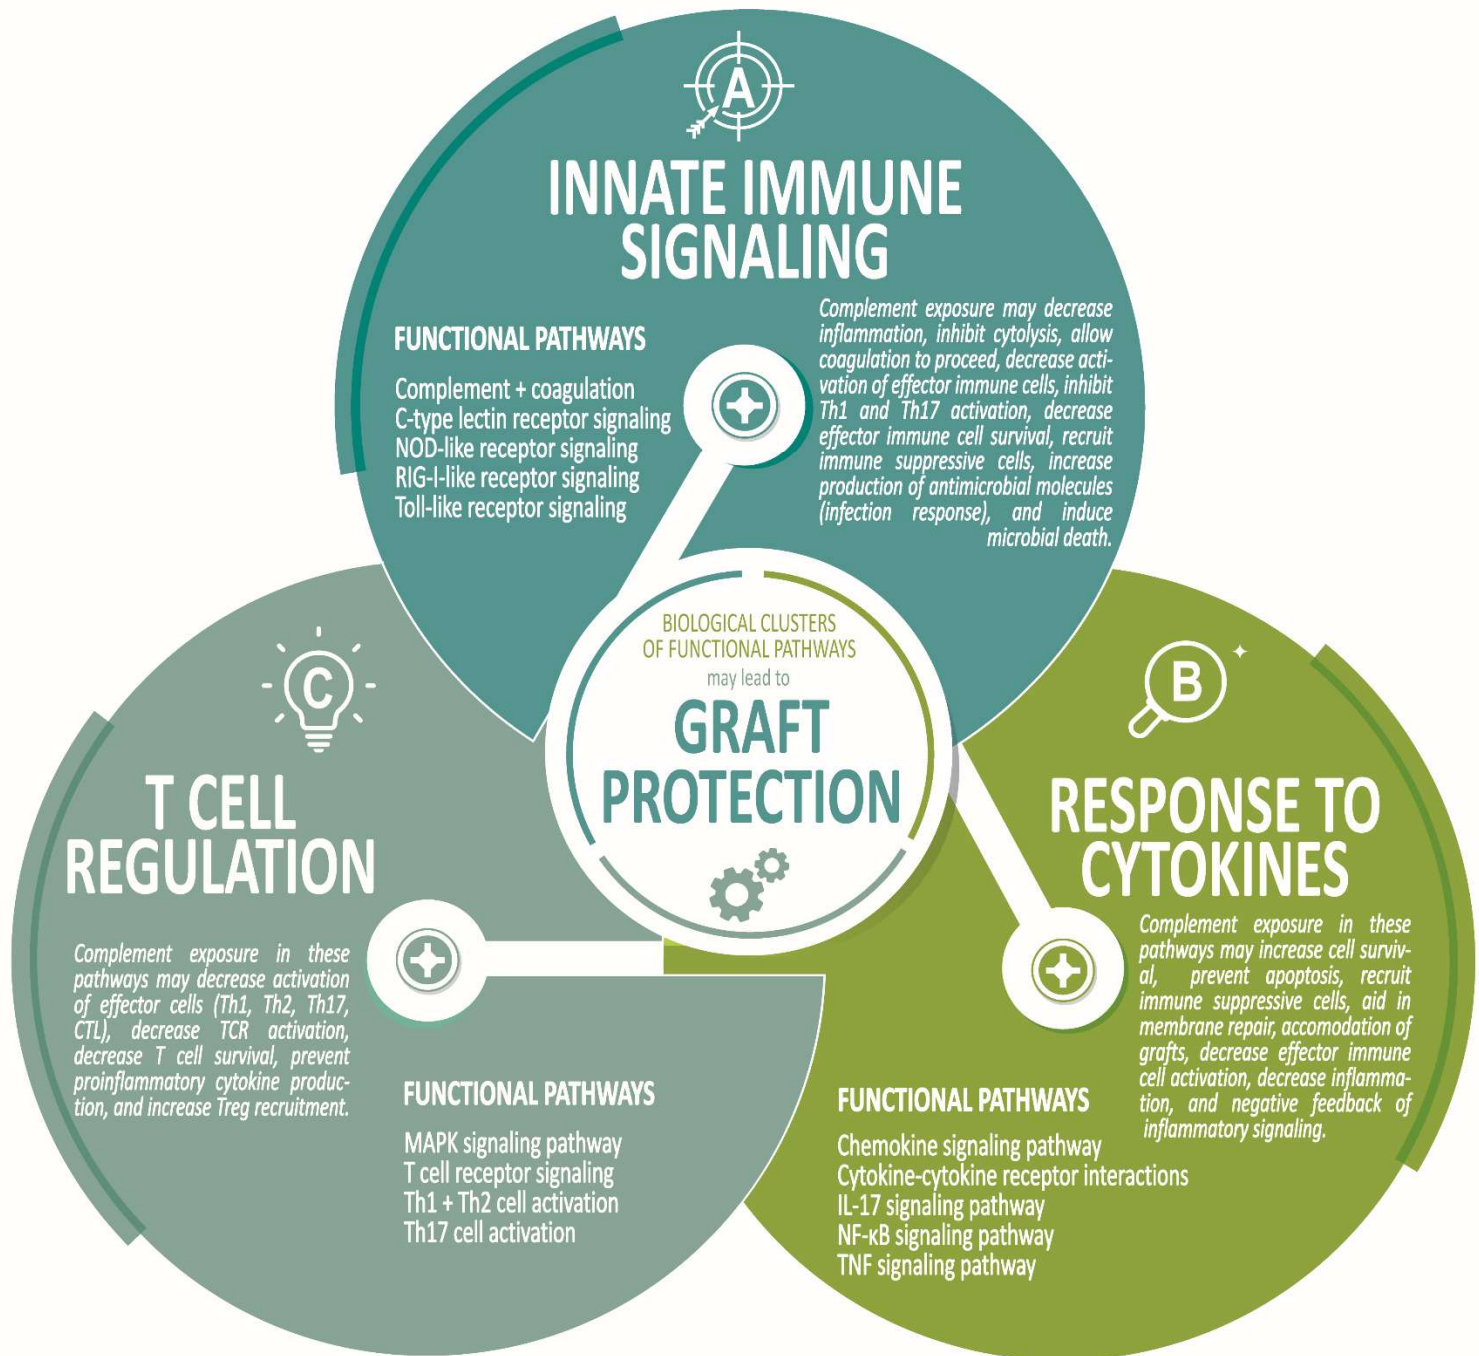

**Figure S2.** Venn diagram of the three NPSC biological clusters affected by complement. NPSC functional pathways are divided into three biological clusters: innate immune signaling (A), response to cytokines (B), and T cell regulation (C). Each circle contains a list of the functional pathways contained therein and a description of the possible effects complement may be having on these pathways.
