# Supplementary material for: Sertoli Cells Express Accommodation, Survival, and Immunoregulatory Factors When Exposed to Normal Human Serum
Source: MDPI journal article supplement (doi:10.3390/biomedicines11061650), 2023-06-06
Supplement: s1 [file s1]

**A**

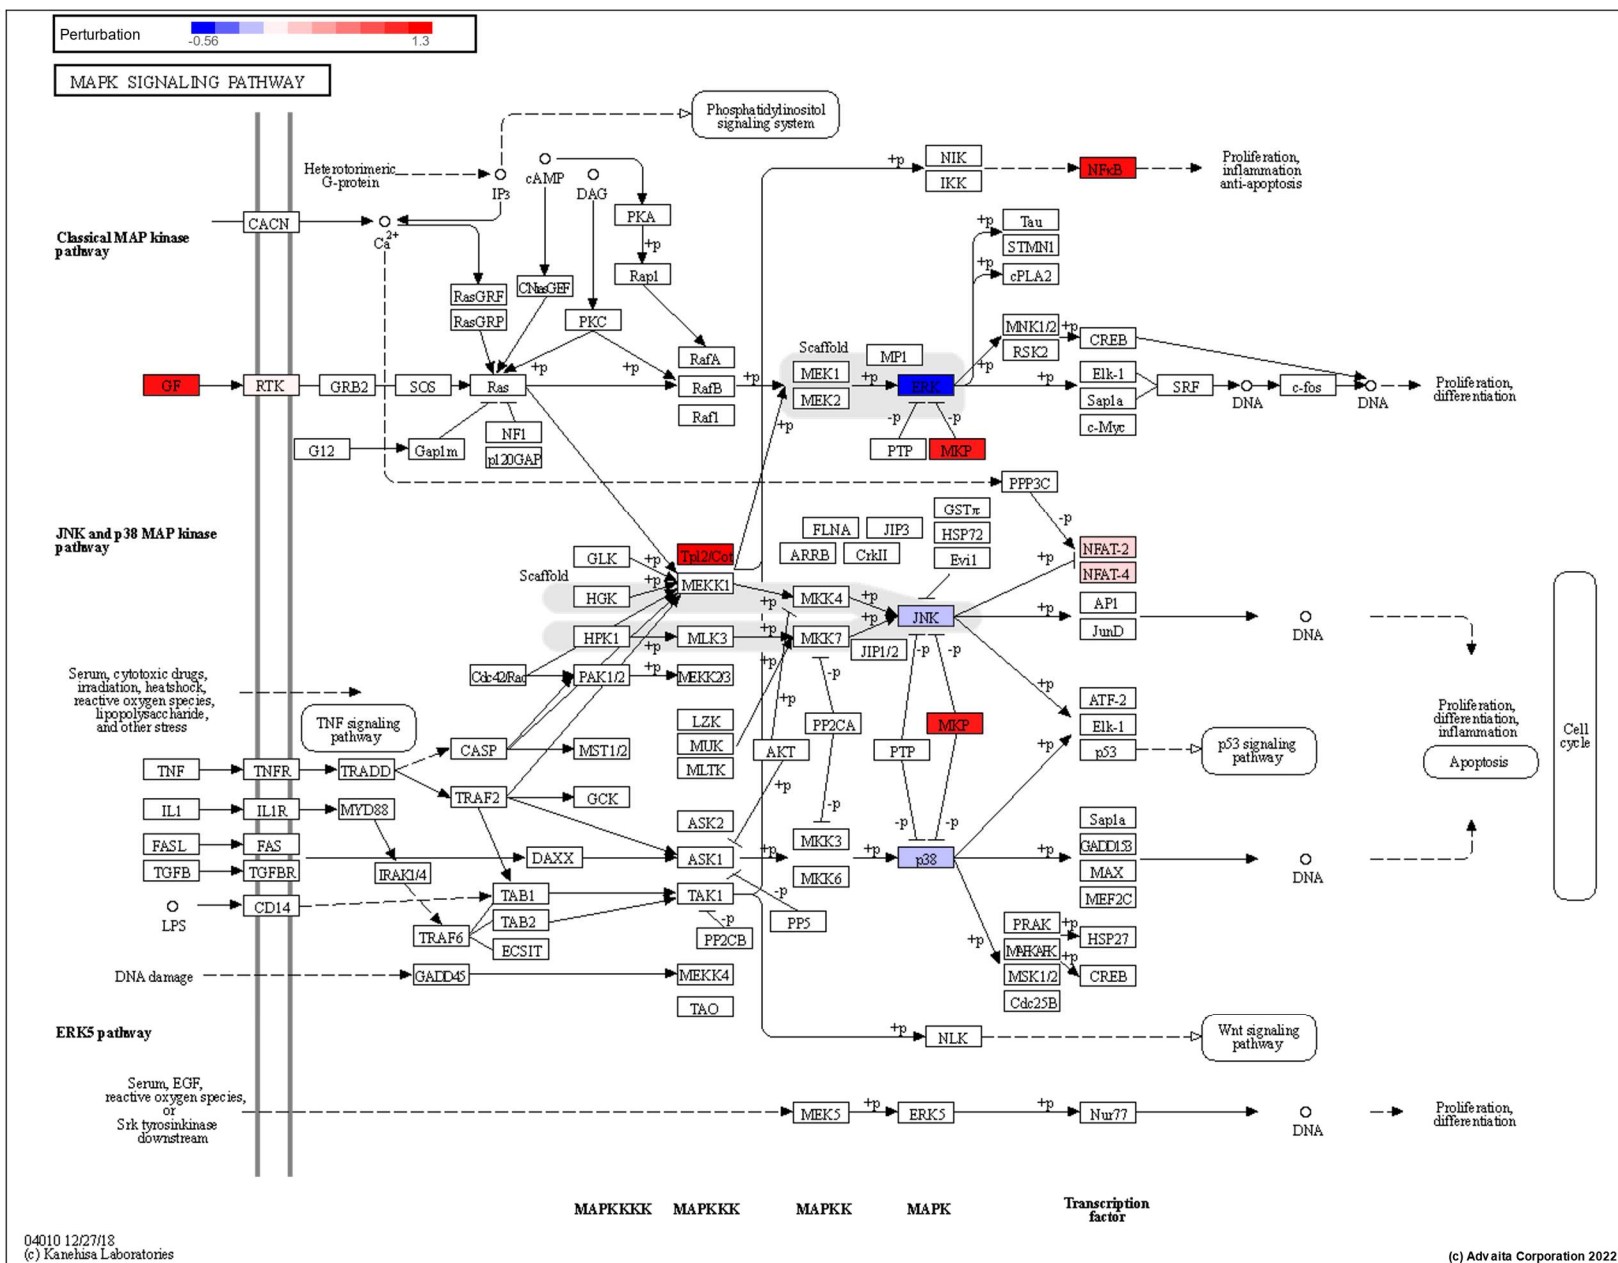

B

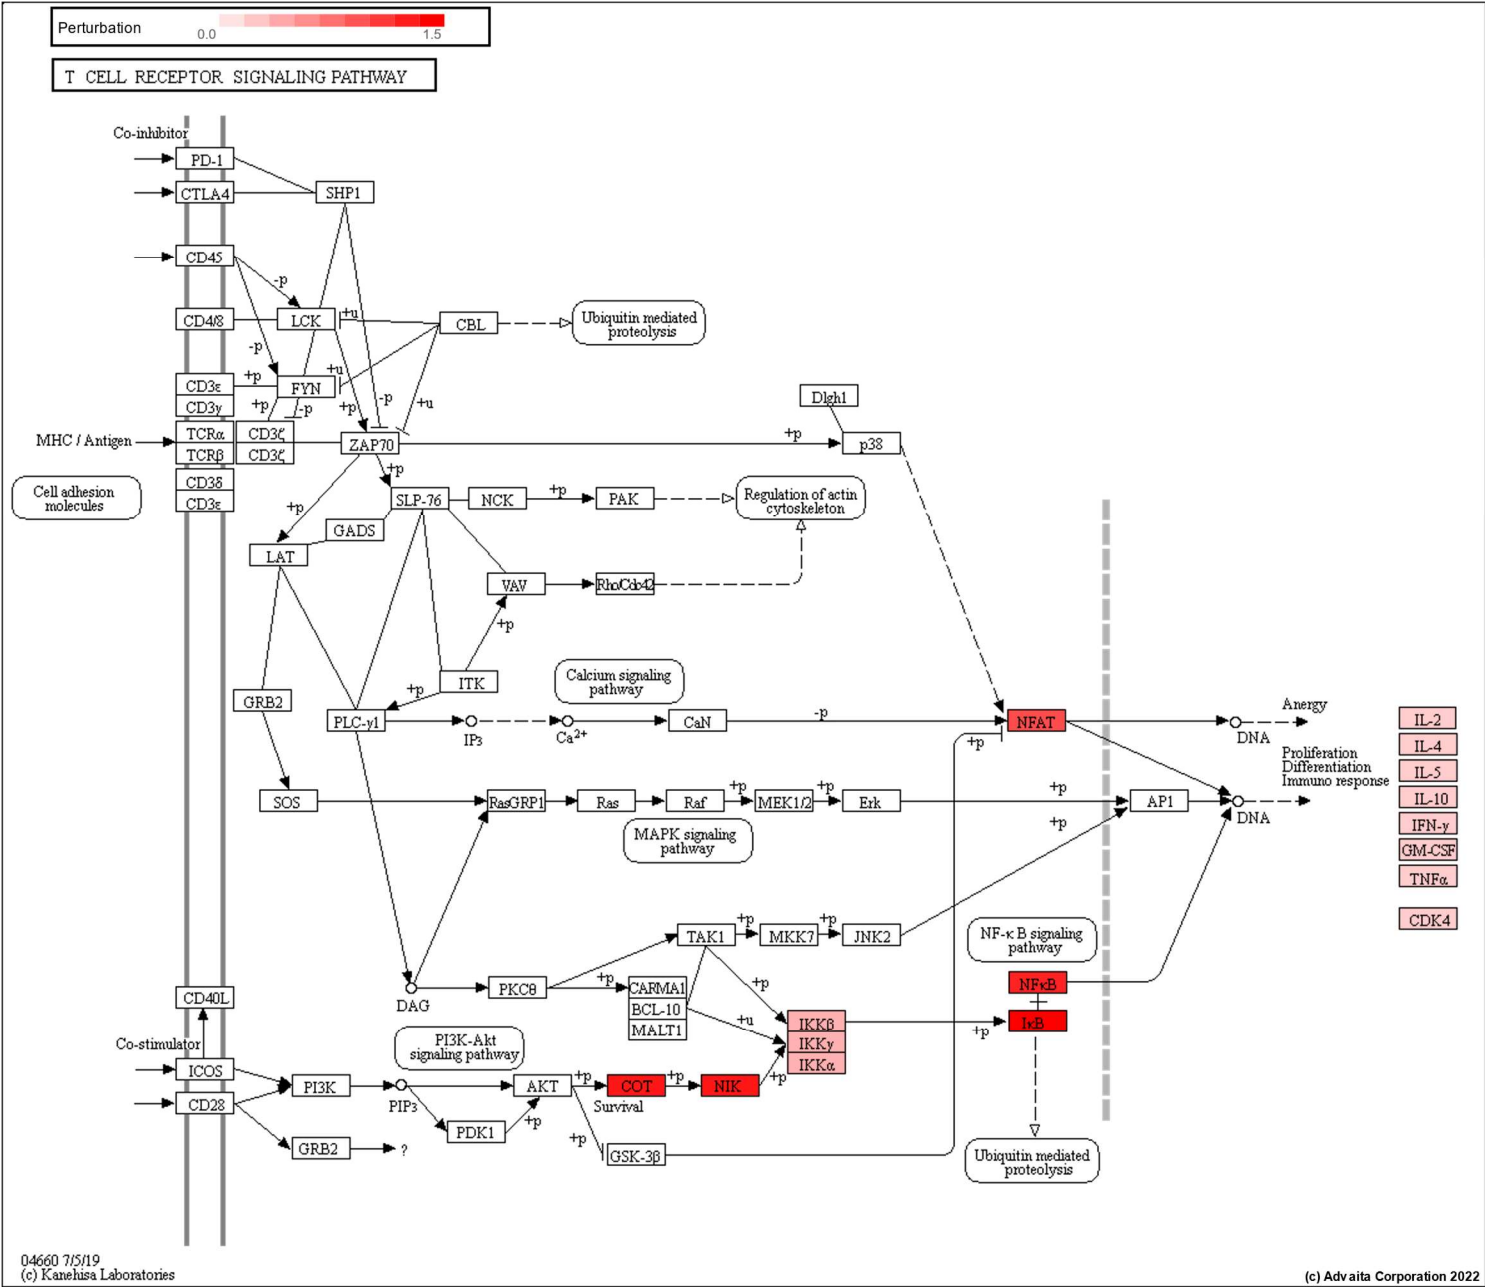

C

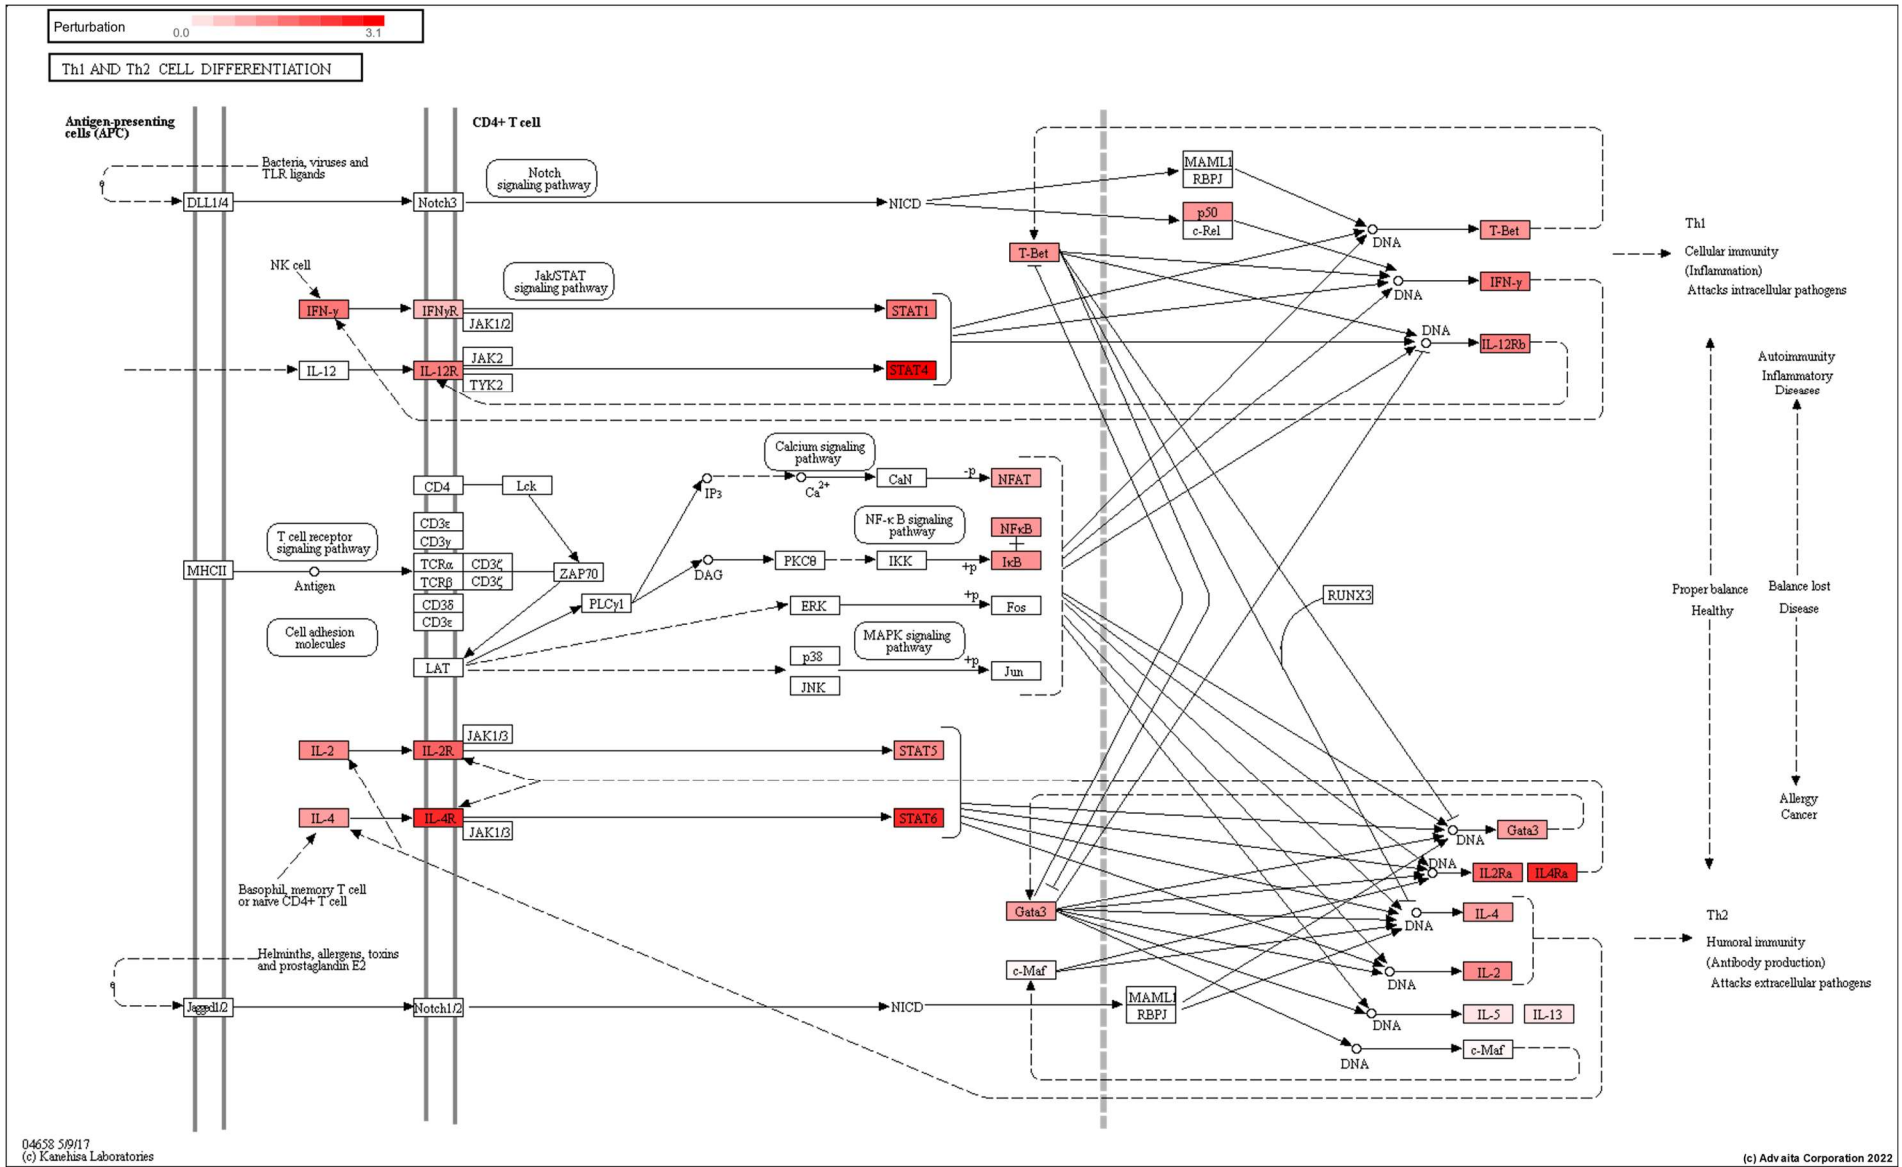

D

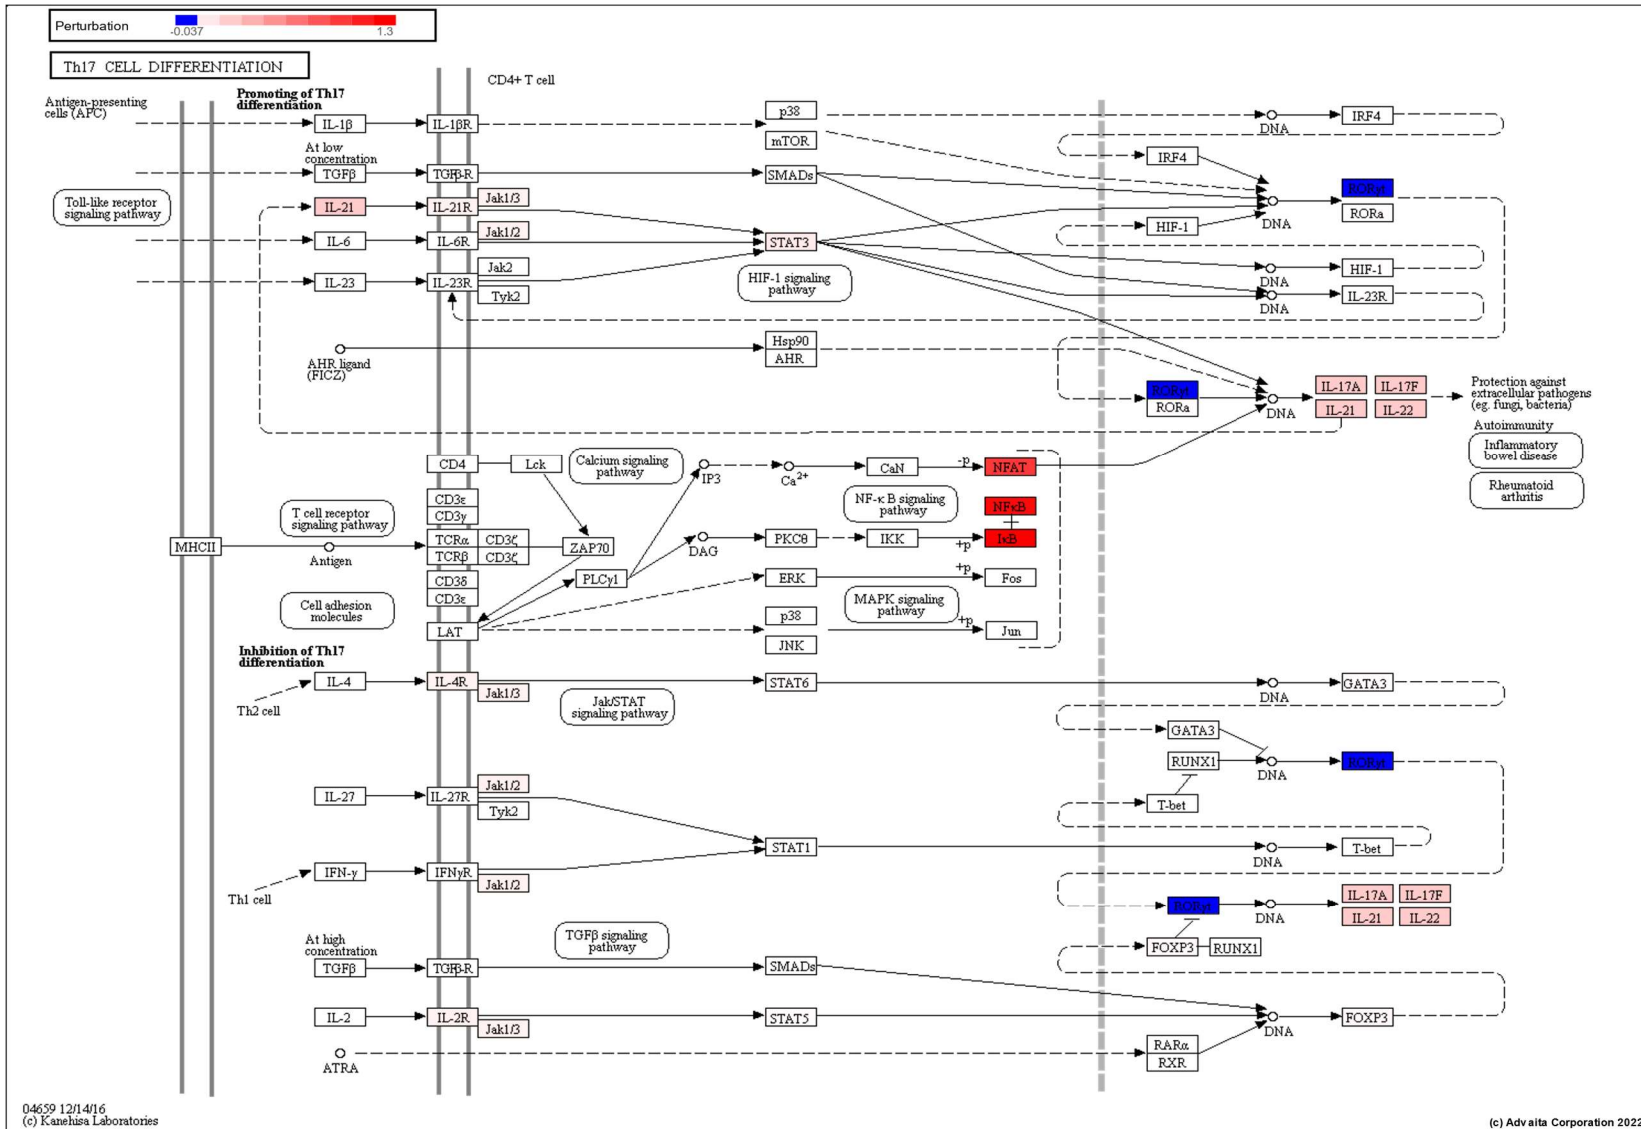

**Figure S5.** T cell regulation. T cell regulatory pathways in NPSC affected by NHS include (A) MAPK signaling, (B) TCR signaling, (C) Th1/Th2 cell activation, and (D) Th17 cell activation. Pathway perturbations are represented. Red highlighted genes are projected to be significantly upregulated while blue highlighted genes are projected to be significantly downregulated. Pathway analysis figures were created with Advaita iPathwayGuide.
