# Supplementary material for: Sertoli Cells Express Accommodation, Survival, and Immunoregulatory Factors When Exposed to Normal Human Serum
Source: MDPI journal article supplement (doi:10.3390/biomedicines11061650), 2023-06-06
Supplement: s1 [file s1]

## Supplementary Materials

**Table S1.** Genes of interest PCR primers.

| Gene           | Forward Primer (5' → 3') | Reverse Primer (5' → 3') |
|----------------|--------------------------|--------------------------|
| <b>C6</b>      | GAGCTTGCTCCCATCACAGA     | TGGCTGCGTATTCTCGGAAA     |
| <b>CCL2</b>    | CCAGGACTCCATAAGCCACC     | AATGTGCCCAAGTCTCCGTT     |
| <b>CCL20</b>   | TCGCCAATGAAGCTTGTGAC     | CCAATTCCATAGCAGGGAGCA    |
| <b>CXCL8</b>   | GCAGAGCTCACAAGCTCCTA     | AAGTCATGTTGACACGGGCT     |
| <b>EGR1</b>    | CCTTCGGCTCCTTTCCACAT     | GGGAAAAGACTCTGCGGTCA     |
| <b>GAPDH*</b>  | CCTCCCCGTTTCGACAGACA     | GATGCGGCCAAATCCGTT       |
| <b>KERA</b>    | GGAGCCCTGAGTCAACTGAA     | GCAGGTCAAGAAGGGTCAGG     |
| <b>LYZ</b>     | GCAAGACACCCAAAGCAGTT     | ACCCCGAATGTACTGCGAGA     |
| <b>NFKB1</b>   | CACGCCAATGCCCTTTTGA      | GTTACCCAAGCGGTCCAGAA     |
| <b>NFKBIA</b>  | AGACTCGTTCCTGCACTTGG     | TCTCGGAGCTCAGGATCACA     |
| <b>PTGS2</b>   | CAGAAGCGAGGACCAGCTTT     | CAGCCAGATTGTGGCGTACA     |
| <b>SUSD4</b>   | GAGACTCTTGGCCGTGATCC     | AGCTGGAATCCGTCTTGGA      |
| <b>TNFAIP3</b> | AAGTGAGGAAGCTTGTGGCA     | AATCCTCAGTCCAATTCGGG     |

\*Endogenous control

**Table S2.** qPCR quantification of GOI between baseline and complement NPSC.

| Gene           | Baseline | Complement | -log2(FC) | p-value  |
|----------------|----------|------------|-----------|----------|
| <i>C6</i>      | 1.008    | 1.574      | 3.776     | 0.072983 |
| <i>CCL2</i>    | 1.008    | 6.480      | 4.794     | 0.036041 |
| <i>CCL20</i>   | 1.014    | 25.02      | 10.97     | 0.000499 |
| <i>CXCL8</i>   | 1.001    | 4.466      | 5.165     | 0.027880 |
| <i>EGR1</i>    | 1.005    | 6.944      | 12.56     | 0.000166 |
| <i>KERA</i>    | 1.002    | 1.271      | 1.011     | 0.496254 |
| <i>LYZ</i>     | 1.010    | 0.054      | 19.30     | 0.000002 |
| <i>NFKB1</i>   | 1.001    | 2.982      | 11.46     | 0.000356 |
| <i>NFKBIA</i>  | 1.005    | 6.389      | 12.57     | 0.000165 |
| <i>PTGS2</i>   | 1.009    | 23.73      | 7.108     | 0.007250 |
| <i>SUSD4</i>   | 1.006    | 1.116      | 1.639     | 0.321186 |
| <i>TNFAIP3</i> | 1.005    | 5.478      | 7.444     | 0.005741 |

**Table S3.** Genes of interest.

| <b>Gene</b>    | <b>Gene Name</b>                                             | <b>Function</b>                                                                                                                                                            |
|----------------|--------------------------------------------------------------|----------------------------------------------------------------------------------------------------------------------------------------------------------------------------|
| <b>C6</b>      | Complement component 6                                       | Part of the MAC                                                                                                                                                            |
| <b>CCL2</b>    | C-C motif chemokine ligand 2                                 | Cytokine involved in chemotaxis of monocytes, basophils, memory T cells, and dendritic cells; receptors include CCR2 and CCR14                                             |
| <b>CCL20</b>   | C-C motif chemokine ligand 20                                | Antimicrobial cytokine; immune regulation; inflammation; chemotaxis of dendritic cells, effector lymphocytes, and memory lymphocytes; CCR6 is cognate receptor             |
| <b>CXCL8</b>   | C-X-C motif chemokine ligand 8 (i.e., IL-8)                  | Chemotactic factor; inflammation; angiogenesis; increases blood vessel permeability; receptors include CXCR1 and CXCR2                                                     |
| <b>EGR1</b>    | Early growth response 1                                      | Transcription factor for differentiation and mitogenesis genes                                                                                                             |
| <b>KERA</b>    | Keratocan                                                    | Corneal transparency and structure                                                                                                                                         |
| <b>LYZ</b>     | Lysozyme                                                     | Antimicrobial substance; cleaves $\beta$ [1-4]glycosidic linkages between N-acetylmuramic acid and N-acetylglucosamine of peptidoglycans that make up bacterial cell walls |
| <b>NFKB1</b>   | Nuclear factor kappa B subunit 1                             | Transcription regulator for genes involved in many biological processes; regulator of immediate viral responses; associated with inflammation                              |
| <b>NFKBIA</b>  | NFkB inhibitor alpha (i.e., IKBA)                            | Inhibits NFkB function and translocation to nucleus                                                                                                                        |
| <b>PTGS2</b>   | Prostaglandin-endoperoxide synthase 2 (i.e., cyclooxygenase) | Prostaglandin biosynthesis in inflammation and mitogenesis                                                                                                                 |
| <b>SUSD4</b>   | Sushi domain containing 4                                    | Membrane-bound inhibition of alternative and classical complement activation                                                                                               |
| <b>TNFAIP3</b> | Tumor necrosis factor alpha induced protein 3 (i.e., A20)    | Inhibits NFkB function; inhibits TNF-mediated apoptosis; associated with transplant accommodation and survival                                                             |

Data retrieved from NCBI Gene Database <sup>30</sup>.
